# Supplementary material for: Discovery of novel xylosides in co-culture of basidiomycetes Trametes versicolor and Ganoderma applanatum by integrated metabolomics and bioinformatics
Source: PubMed Central journal article supplement (PMC5018966; doi:10.1038/srep33237), 2016-09-12
Supplement: srep33237-s1.pdf [file srep33237-s1.pdf]

## **Supplementary Information for:**

Discovery of novel xylosides in co-culture of basidiomycetes *Trametes versicolor* and *Ganoderma applanatum* by integrated metabolomics and bioinformatics

**Lu Yao<sup>1</sup>, Li-Ping Zhu<sup>1</sup>, Xiao-Yan Xu<sup>1</sup>, Ling-Ling Tan<sup>1</sup>, Martin Sadilek<sup>2</sup>, Huan Fan<sup>3</sup>, Bo Hu<sup>4</sup>, Xiao-Ting Shen<sup>1</sup>, Jie Yang<sup>5</sup>, Bin Qiao<sup>6</sup>, Song Yang<sup>1, 7,\*</sup>**

1. School of Life Science, Qingdao Agricultural University, Shandong Province Key Laboratory of Applied Mycology, and Qingdao International Center on Microbes Utilizing Biogas, Qingdao266109, Shandong Province, China
2. Department of Chemistry, University of Washington, Seattle, Washington 98195, United States of America
3. Tianjin Academy of Agricultural Sciences, Tianjin 300192, China
4. Industrial Product Division, Intrexon Corporation, South San Francisco, CA 94080, United States of America
5. Department of Biochemistry and Molecular Biology, School of Basic Medical Sciences, Tianjin Medical University, Tianjin 300070, China
6. School of Chemical Engineering and Technology, Tianjin University, Tianjin 300070, China
7. Key Laboratory of Systems Bioengineering, Ministry of Education, Tianjin University, Tianjin 300072, China

A

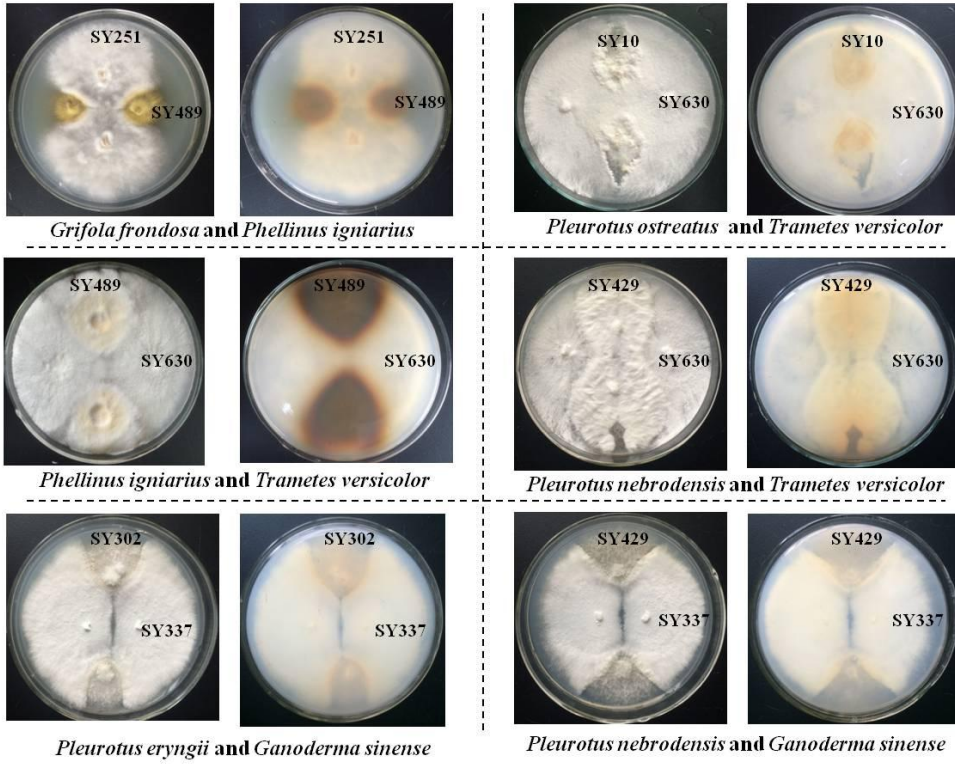

B

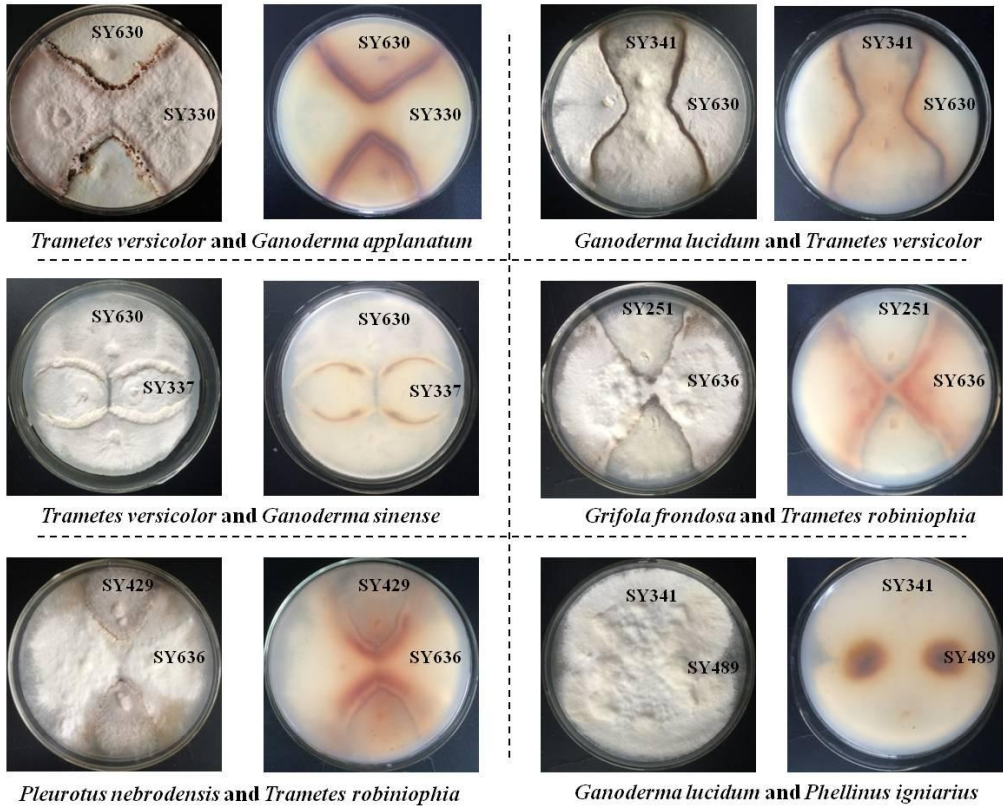

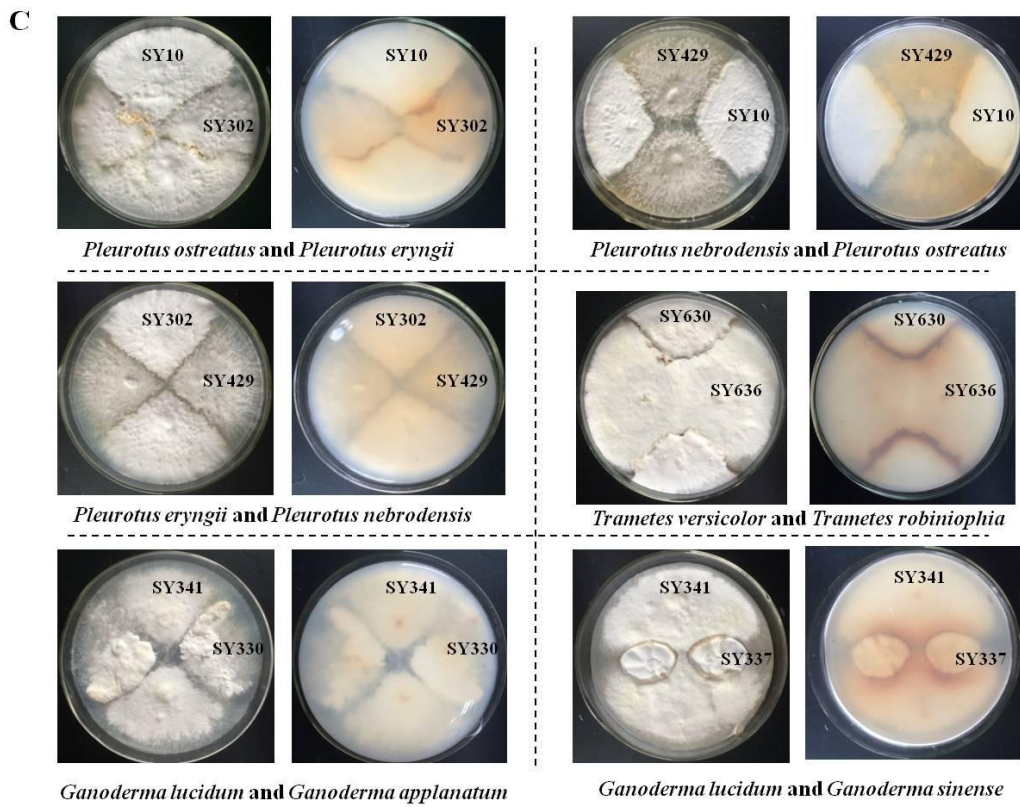

**Figure S1.** Colony morphologies of the representative co-cultures of basidiomycetes on agar plates. (A) Co-cultures (different order); (B) Co-cultures (different family); (C) Co-cultures (different species). For each pair, the left photo was taken from the top of plate and the right photo was taken from the bottom of plate.

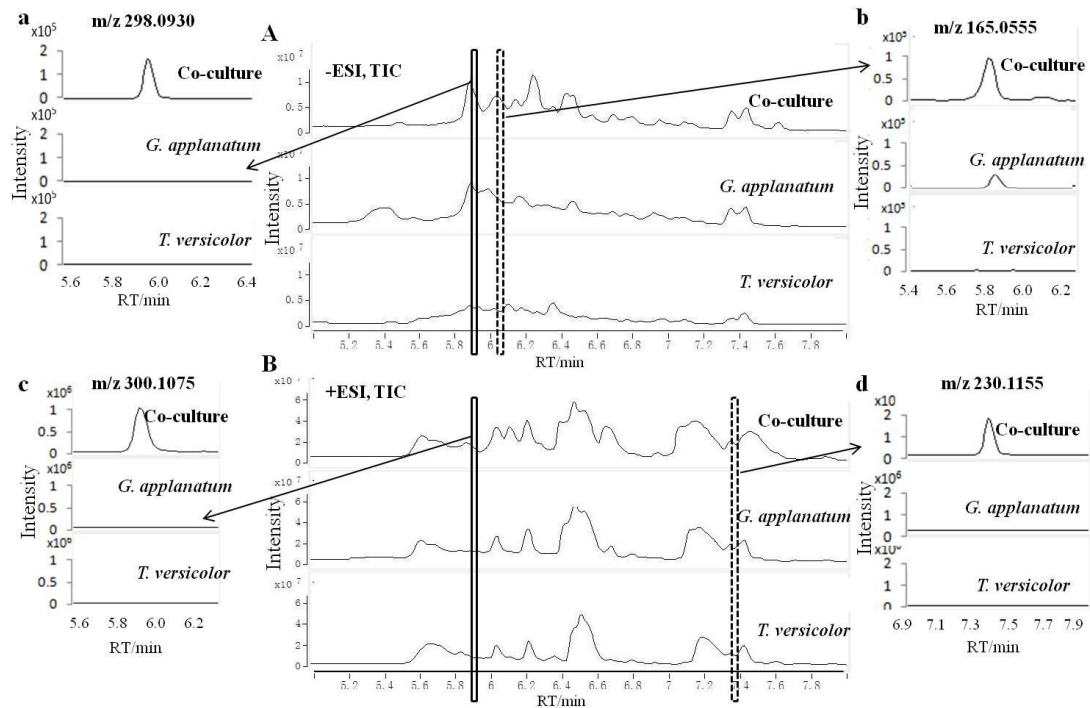

**Figure S2.** Comparison of total ion chromatograms (TICs) between co-culture of *T.versicolor* with *G. applanatum* and their corresponding mono-cultures on the day 23. (A) TICs of co-culture and mono-cultures were acquired by LC-MS in the negative mode. (a) and (b) was extracted ion chromatograms (EICs) of m/z 298.0930 and 165.0555; (B) TICs of co-culture and mono-cultures were acquired by LC-MS in the positive mode. (c) and (d) was EICs of m/z 300.1075 and 230.1155.

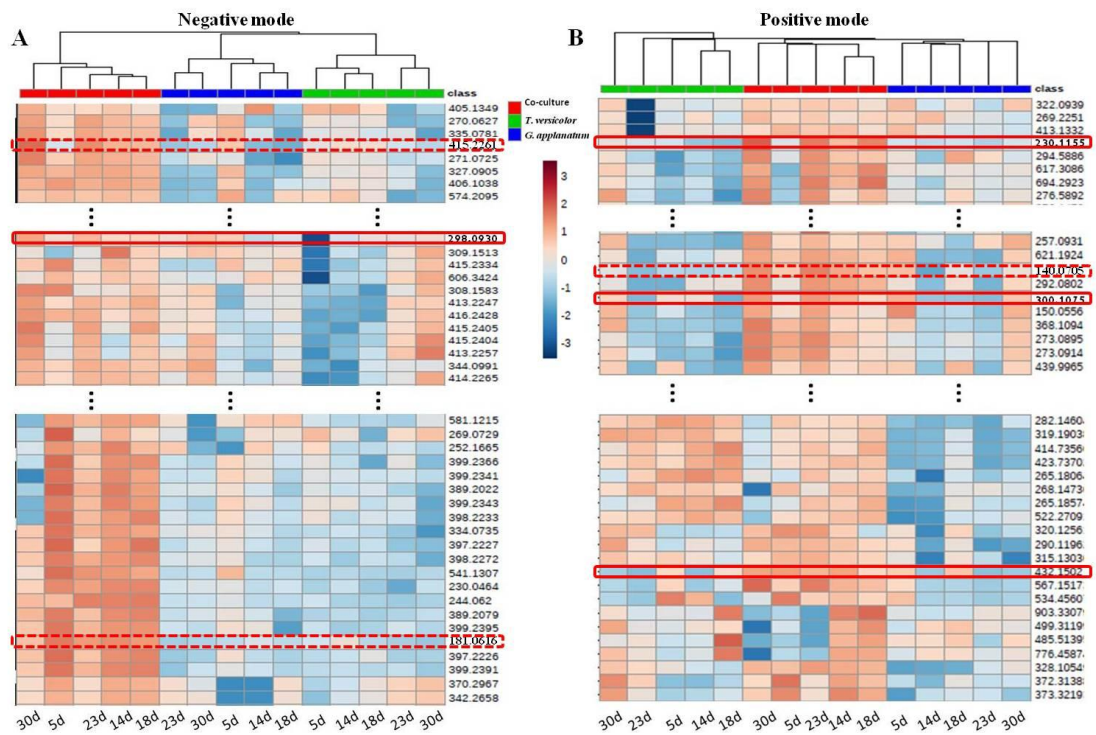

**Figure S3.** Heatmap analysis of co-culture of *T. versicolor* and *G. applanatum* and their corresponding mono-cultures at different time points (5, 14, 18, 23 and 30 days). (A) Heatmap of the features analyzed by LC-MS in the negative mode; (B) Heatmap of the features analyzed by LC-MS in the positive mode. The red squares were the representative features with significant difference between co-culture and mono-cultures, and dotted line squares were features only detected by heatmap analysis. Data was acquired from three independent biological replicates and two analytical replicates.

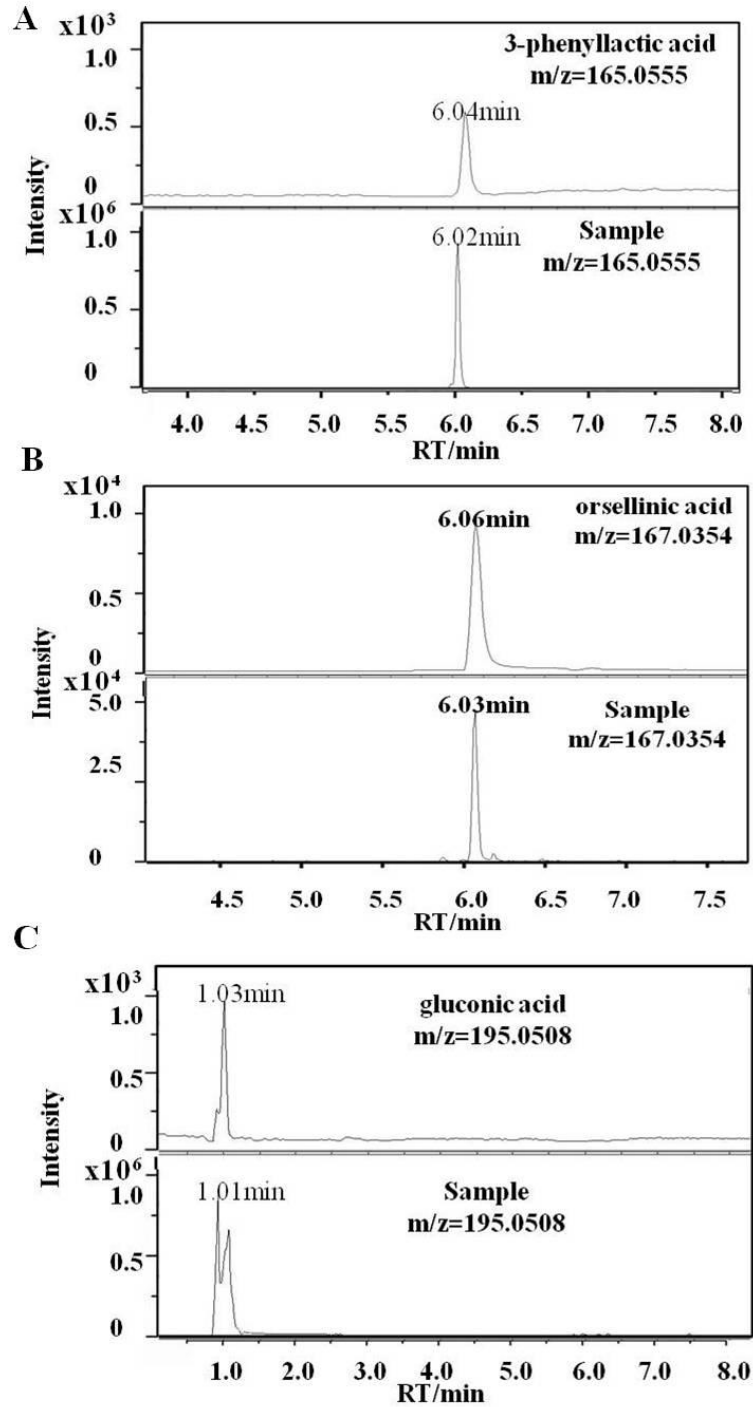

**Figure S4.** A comparison of retention time of three carboxylic acids between the experimental data and standards data. The extracted ion chromatograms was acquired by LC-MS in the negative mode. (A) 3-Phenyllactic acid; (B) orsellinic acid and (C) gluconic acid. Up panel was the standards and down panel was the compounds extracted from the co-culture of *T. versicolor* and *G. applanatum* on the day 9.

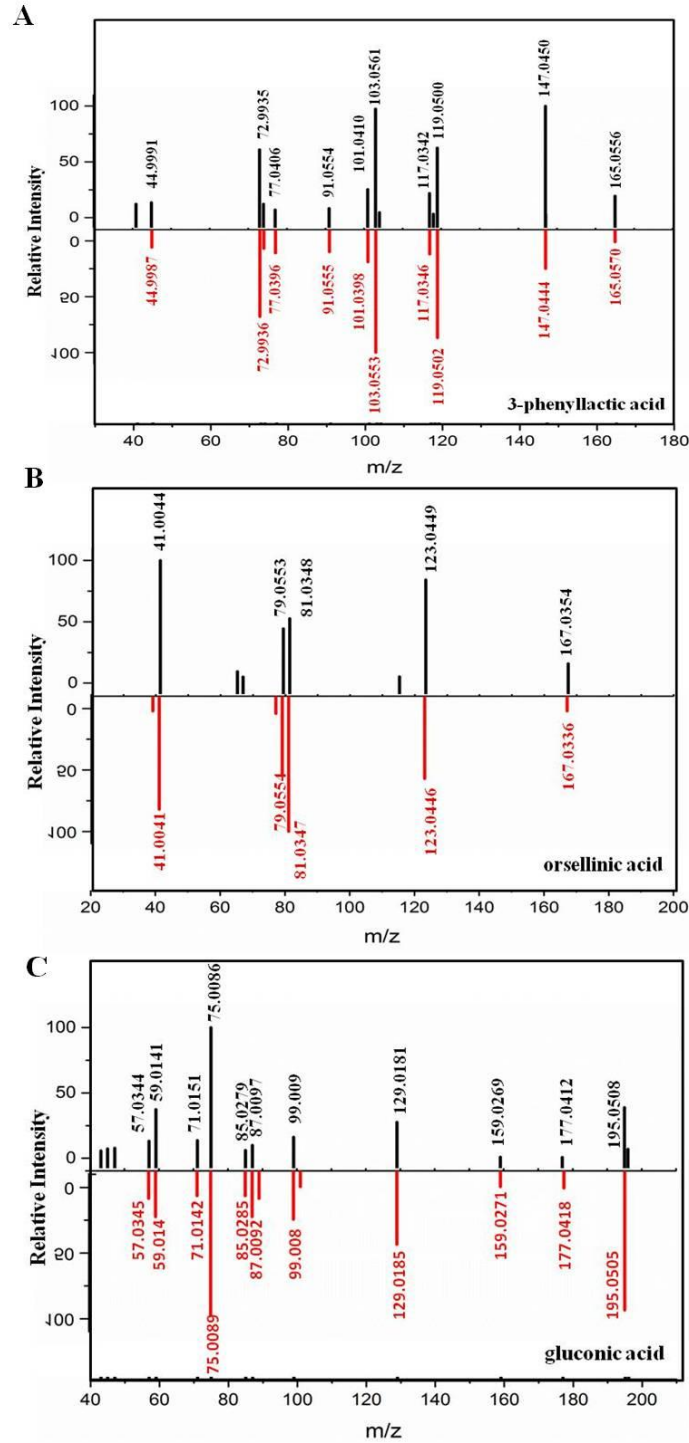

**Figure S5.** A comparison of MS/MS pattern of three carboxylic acids between the experimental data (black) and METLIN data (red). The mass spectral data was acquired by LC-MS/MS in the negative mode. (A) m/z 165.0555 matched with 3-phenyllactic acid; (B) m/z 167.0354 matched with orsellinic acid; (C) m/z 195.0508 matched with gluconic acid.

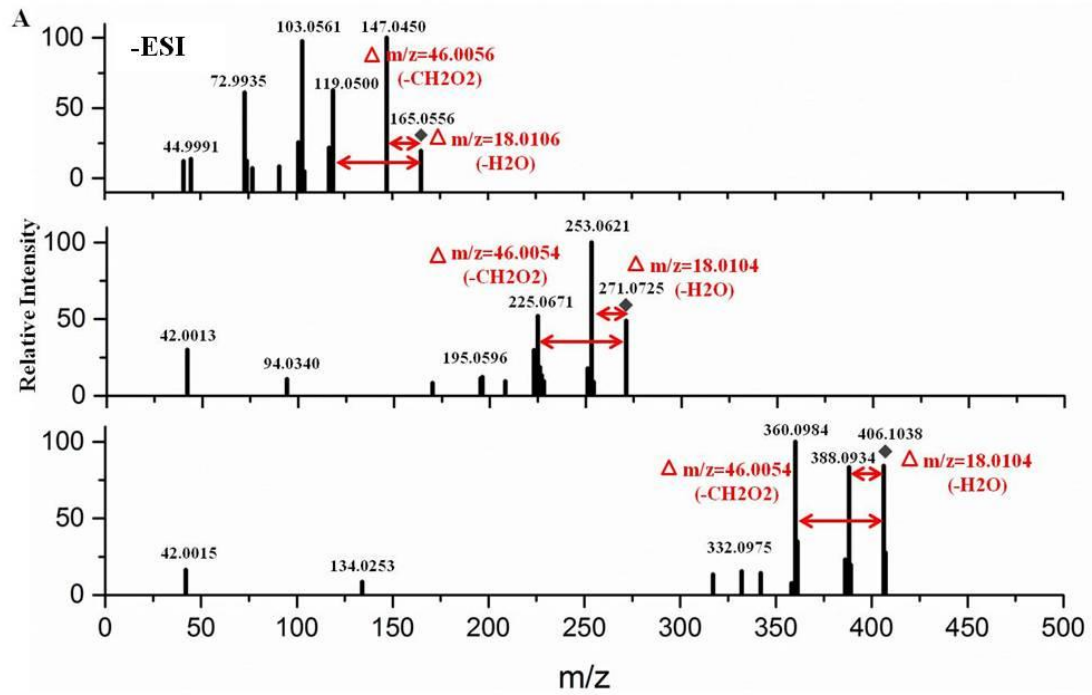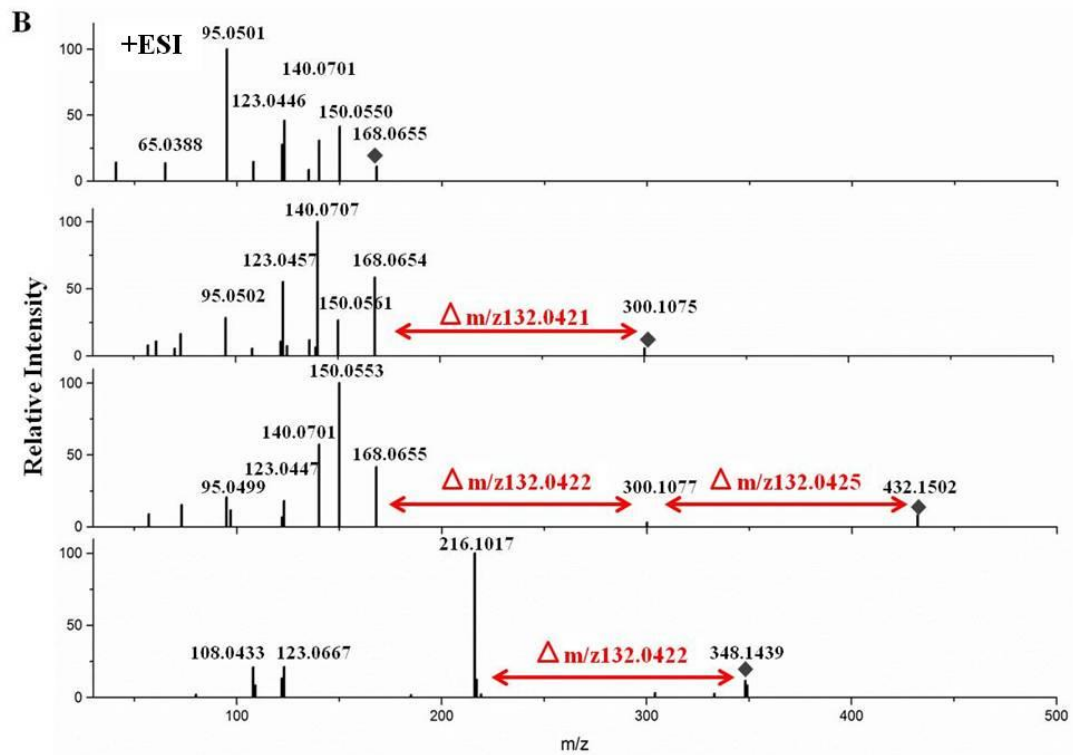



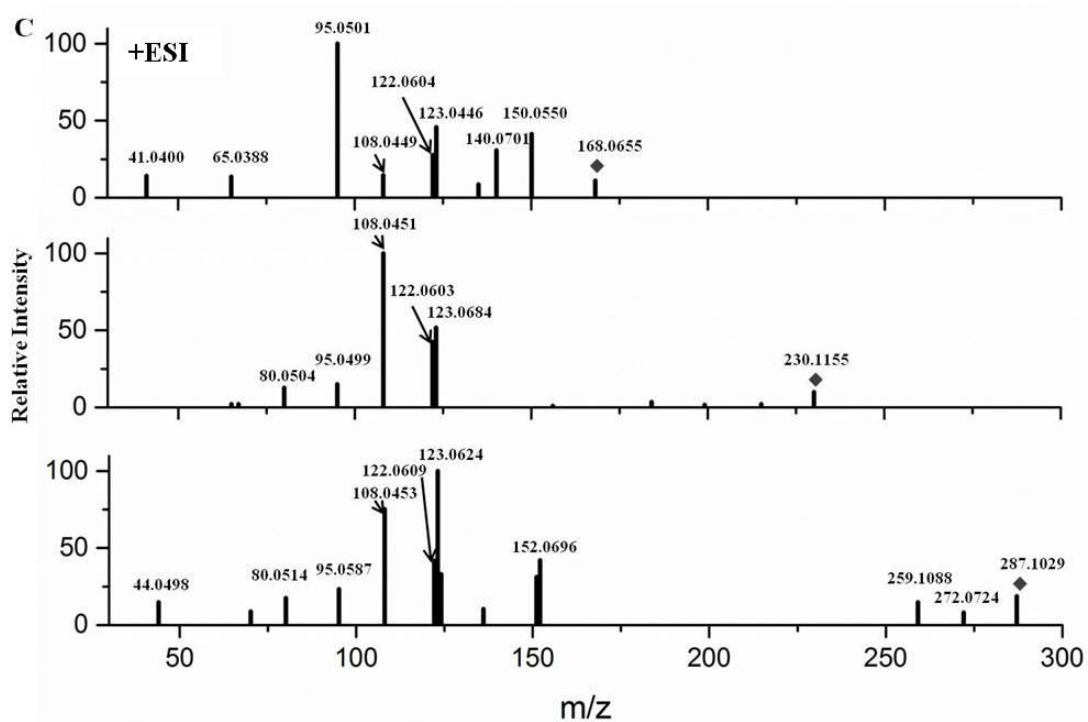

**Figure S6.** A comparison of MS/MS pattern of the features revealed by molecular network analysis. The mass spectral data was acquired by LC-MS/MS. (A) MS/MS spectra of  $m/z$  165.0555, 271.0725, 406.1038 in the negative mode; (B) MS/MS spectra of xylosides ( $m/z$  300.1075, 432.1502 and 348.1439) and  $m/z$  168.0655 in the positive mode; (C) MS/MS spectra of  $m/z$  168.0655 and its clusters ( $m/z$  230.1155 and 287.1029) in the positive mode, and black arrow points out the same fragment ions generated from different parent ions.

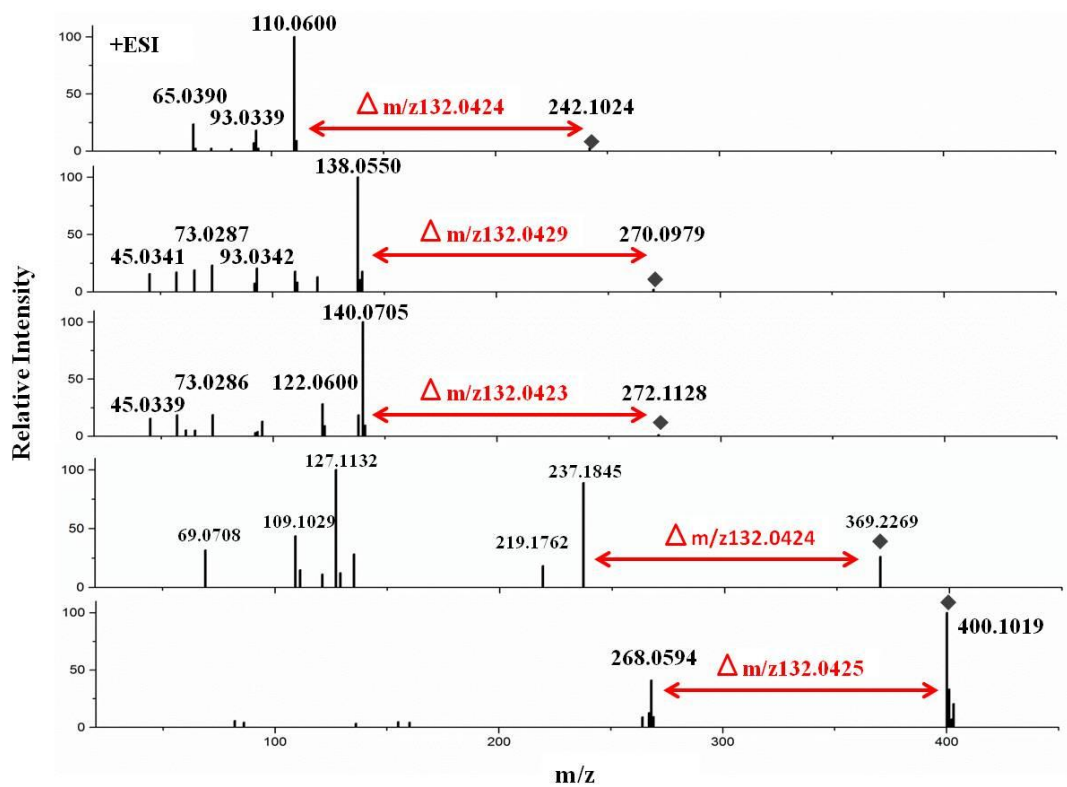

**Figure S7.** The xylosides were revealed by neutral loss scanning for a loss of 132 Dalton by LC-QQQ-MS. The figure shows that their MS/MS spectra were confirmed by high resolution LC-TOFMS in the positive mode.

<sup>1</sup>H spectrum of compound 2

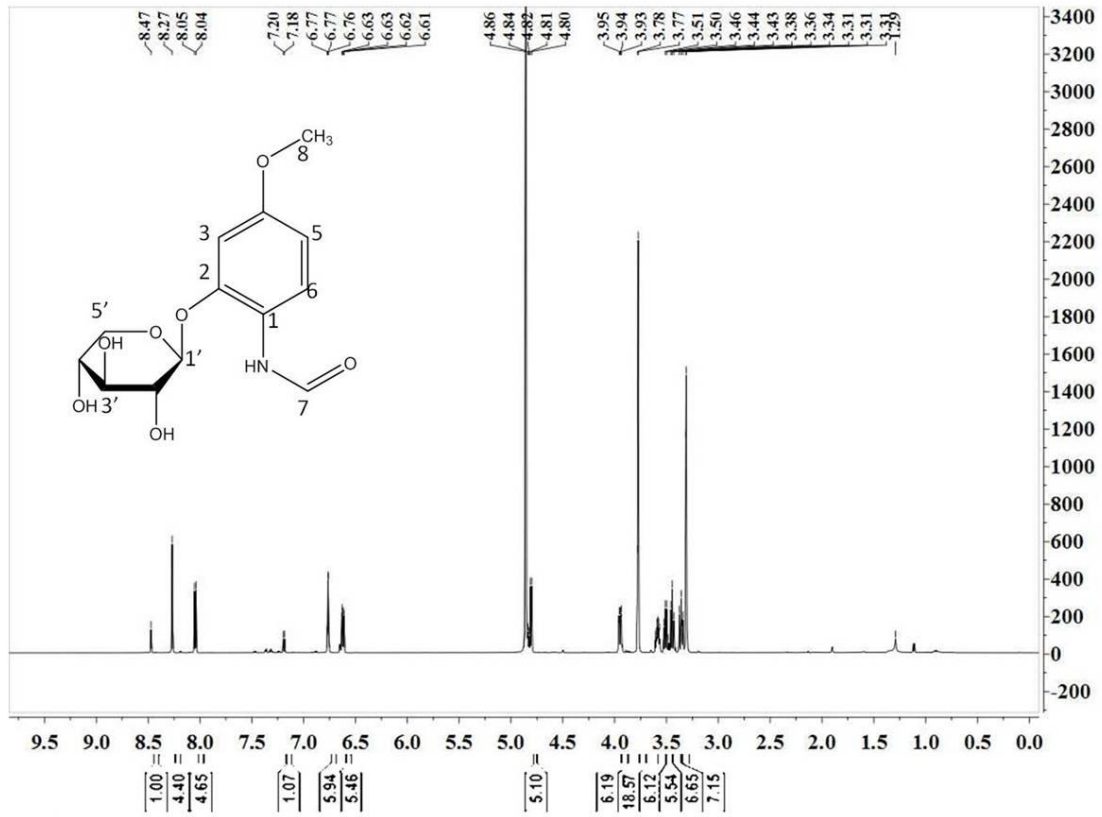

<sup>13</sup>C spectrum of compound 2

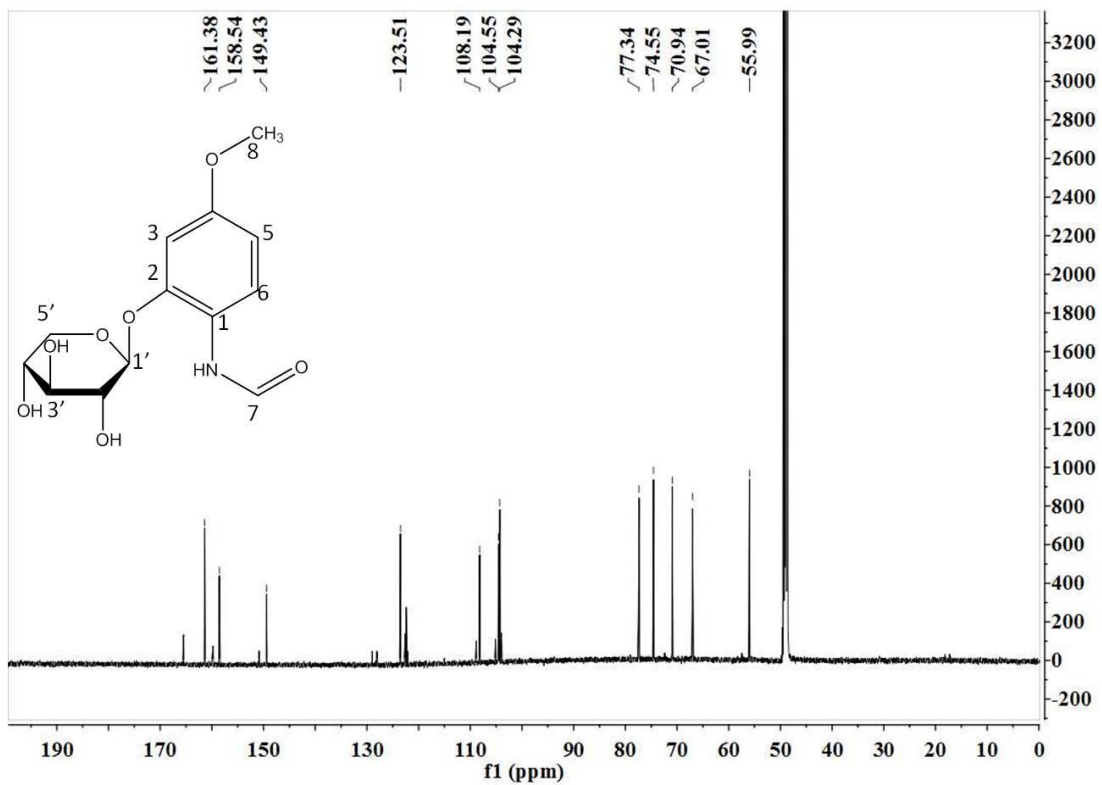

HMBC spectrum of compound 2

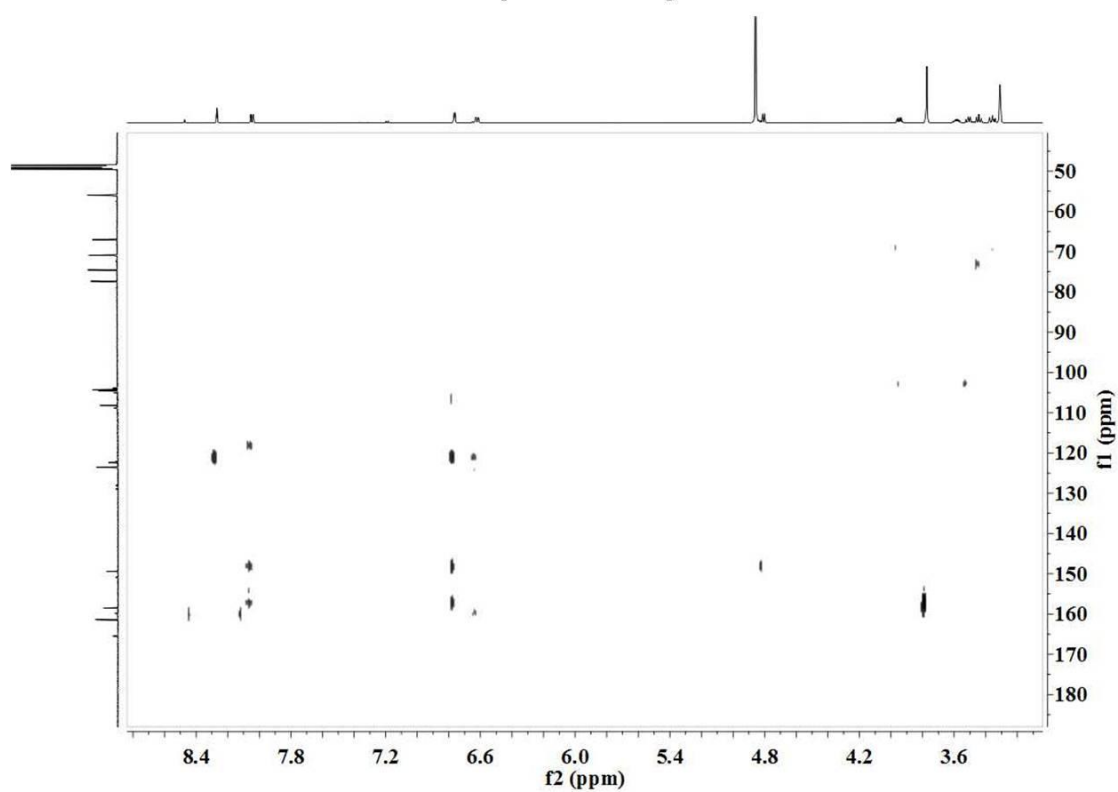

COSY spectrum of compound 2

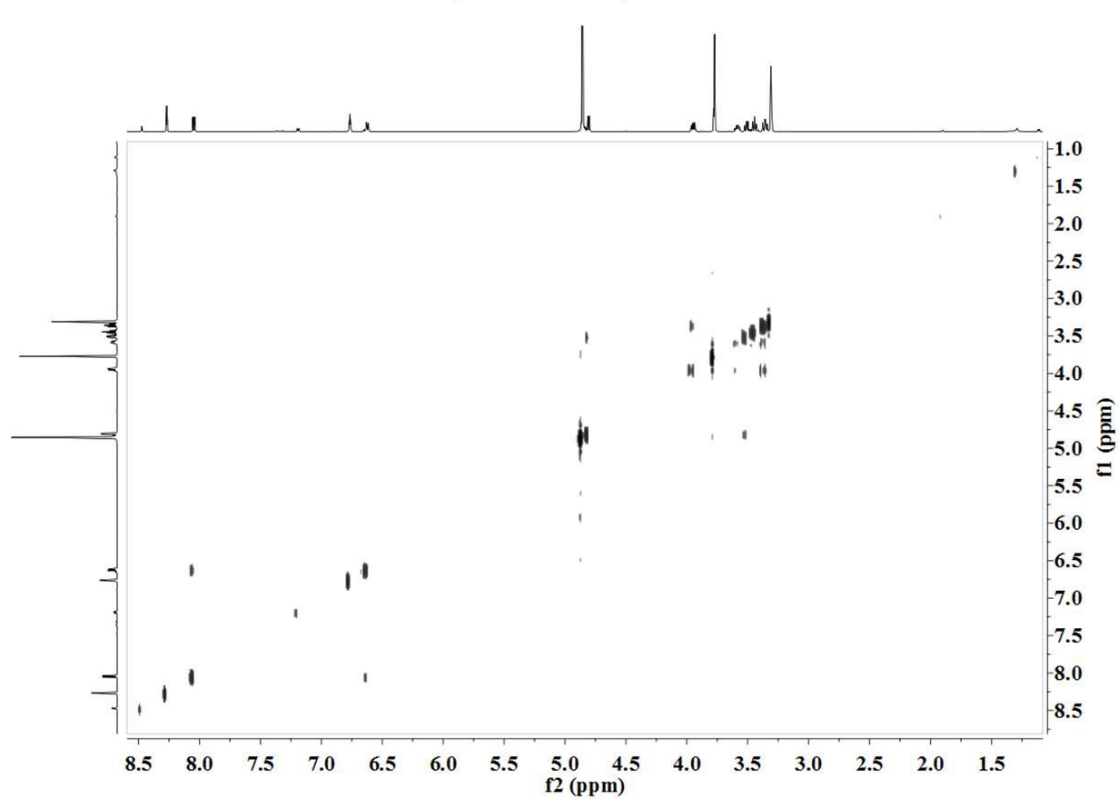

HSQC spectrum of compound 2

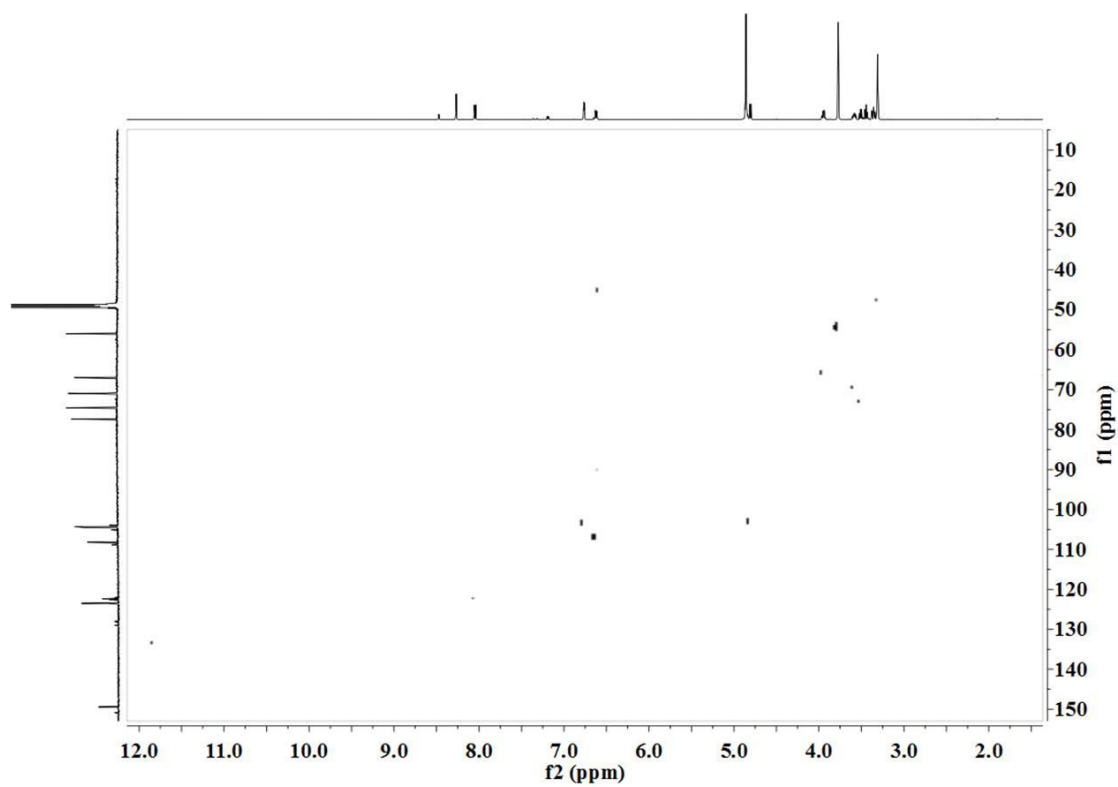

DEPT90° spectrum of compound 2

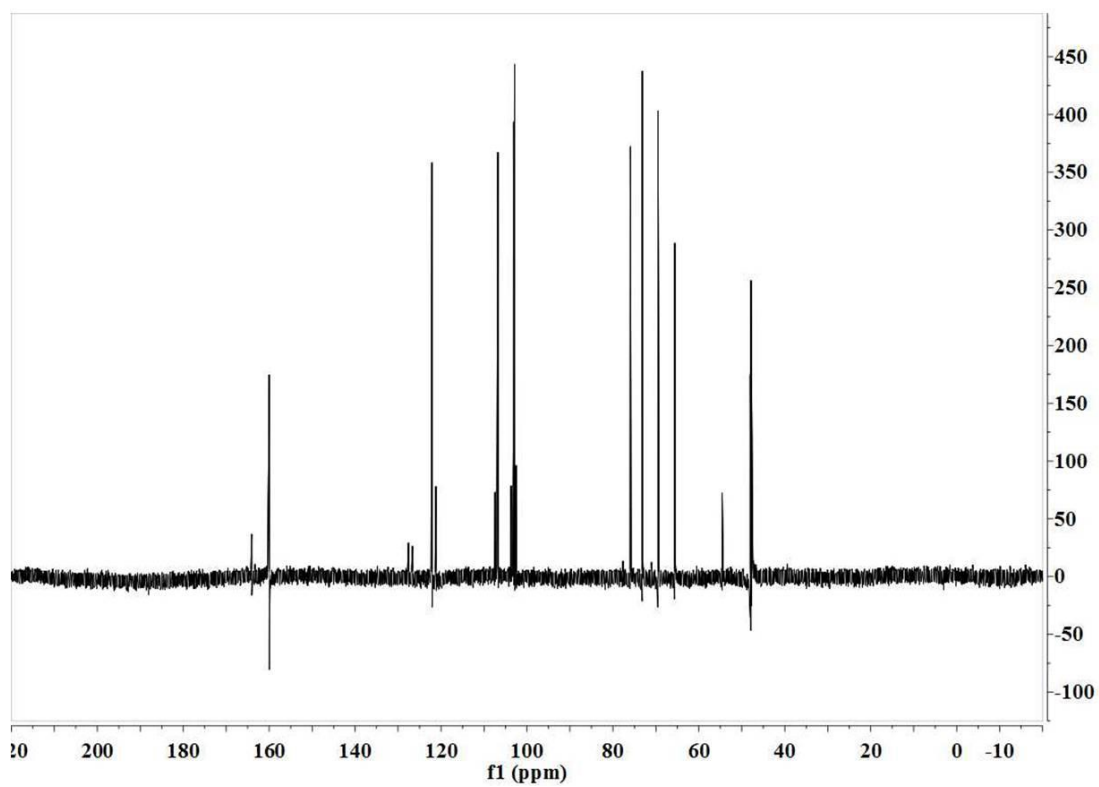

DEPT135° spectrum of compound 2

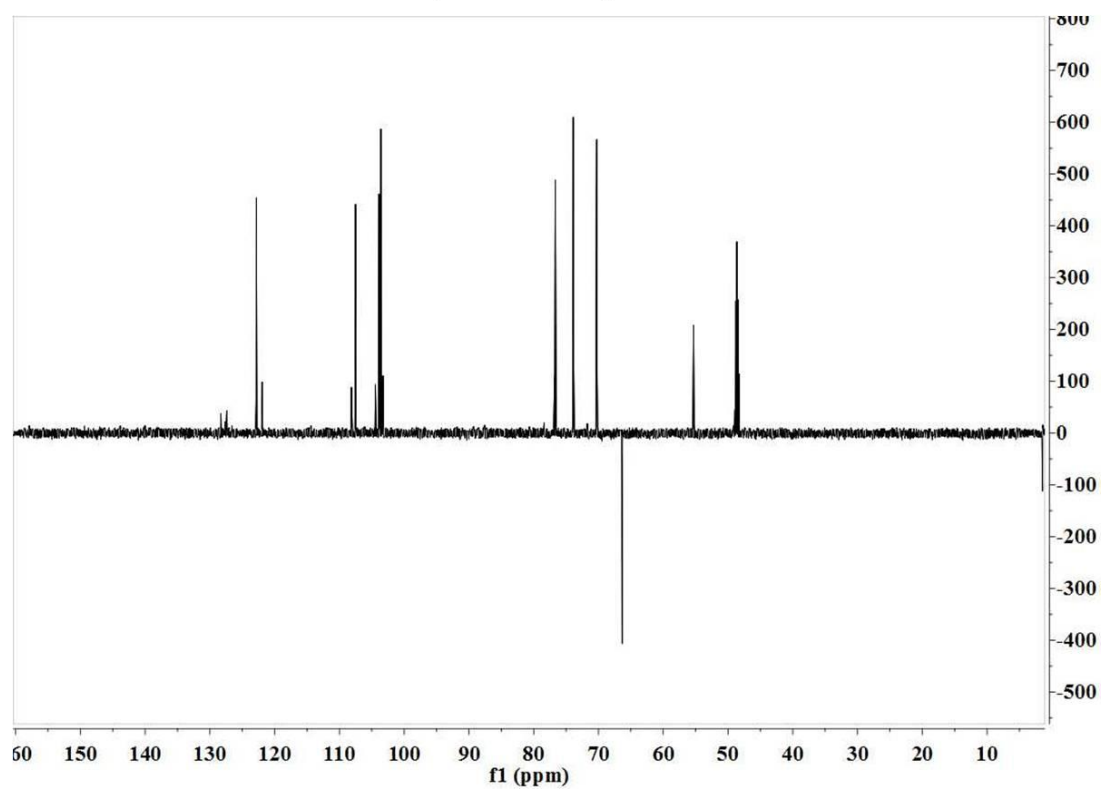

**Figure S8.** NMR spectra of compound 2.

**A**

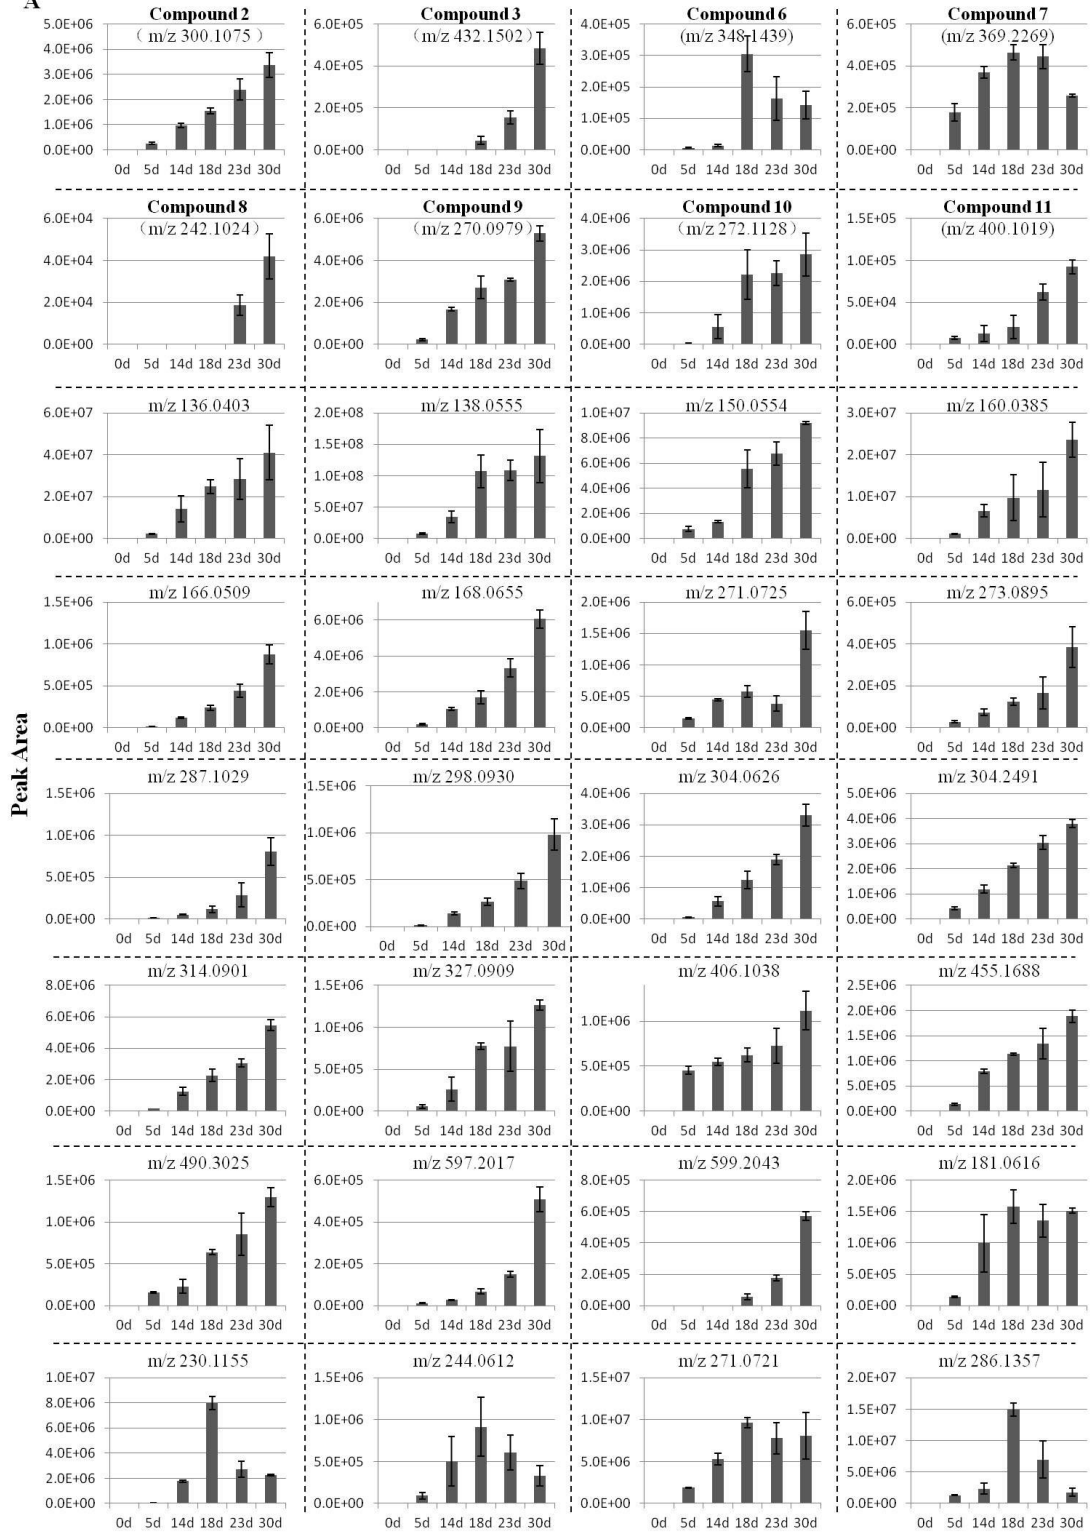

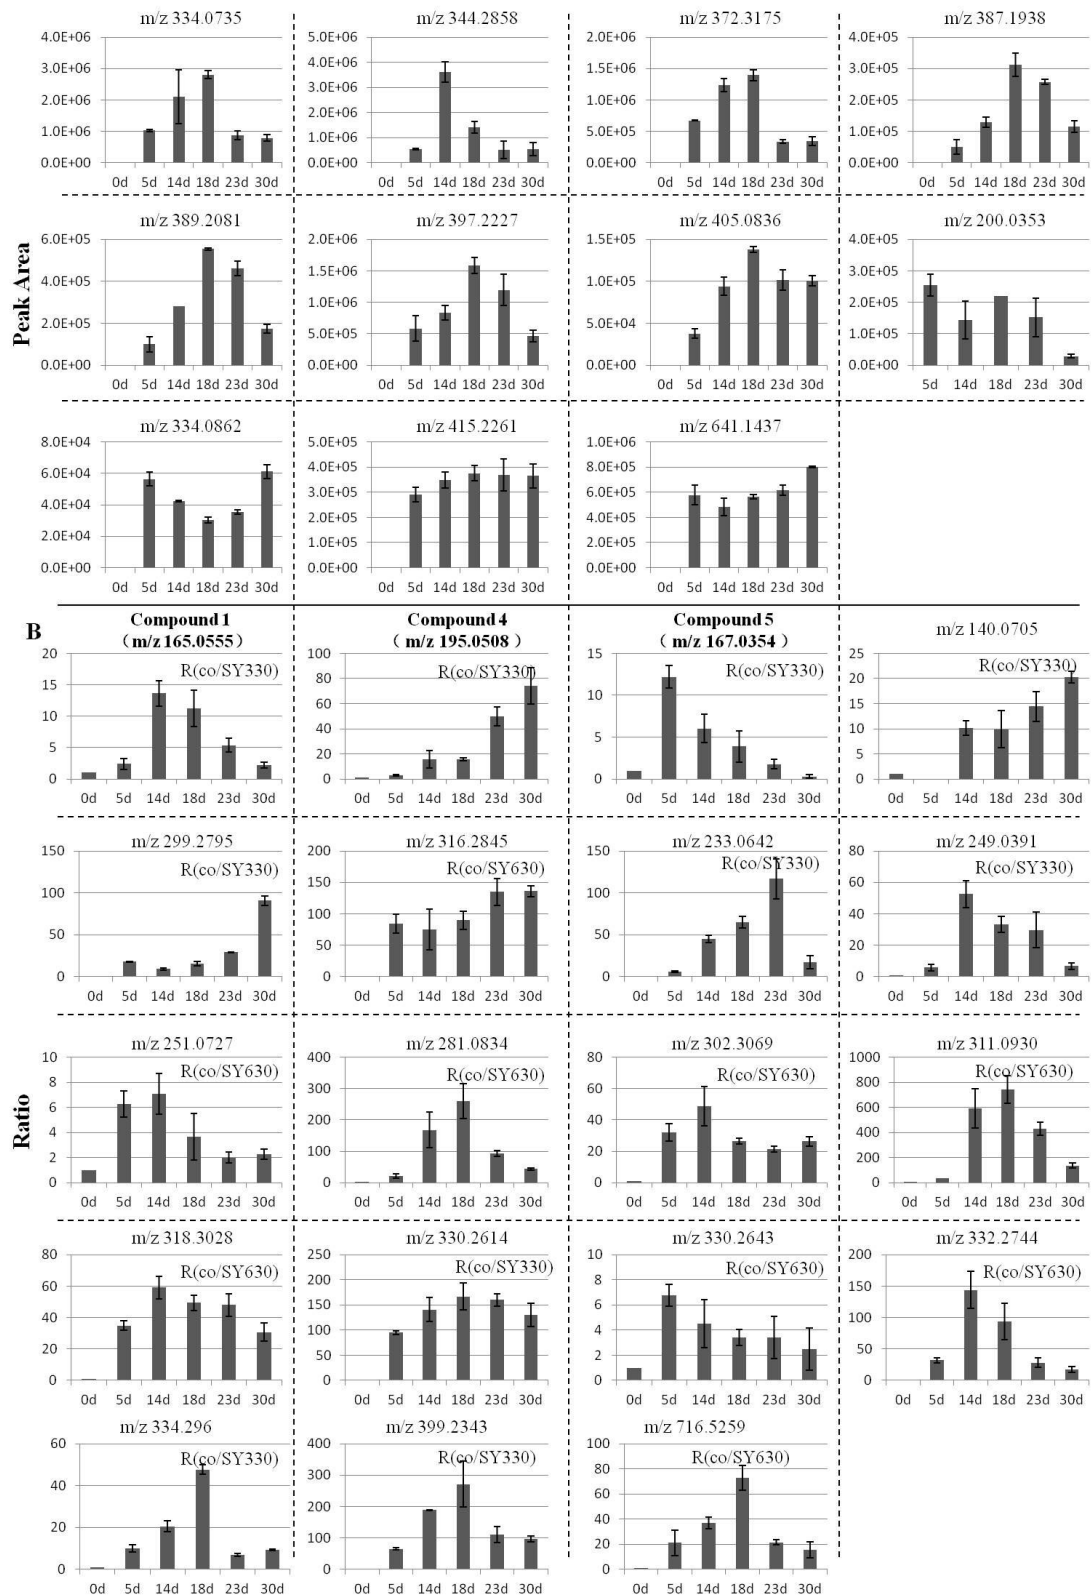

**Figure S9.** Dynamics of induced features accumulation in fungal co-culture from the day 0 to day 30. (A) Induced newly features; (B) Increased features in the co-culture.

R(co/SY330) and R(co/SY630) means the ratio of the abundance in the co-culture to the mono-culture of *G. applanatum* SY330 and the ratio of the abundance in the co-



culture to the mono-culture of *T. versicolor* SY630, respectively. Data show the mean with error bars indicating standard deviation calculated from three independent biological replicates.

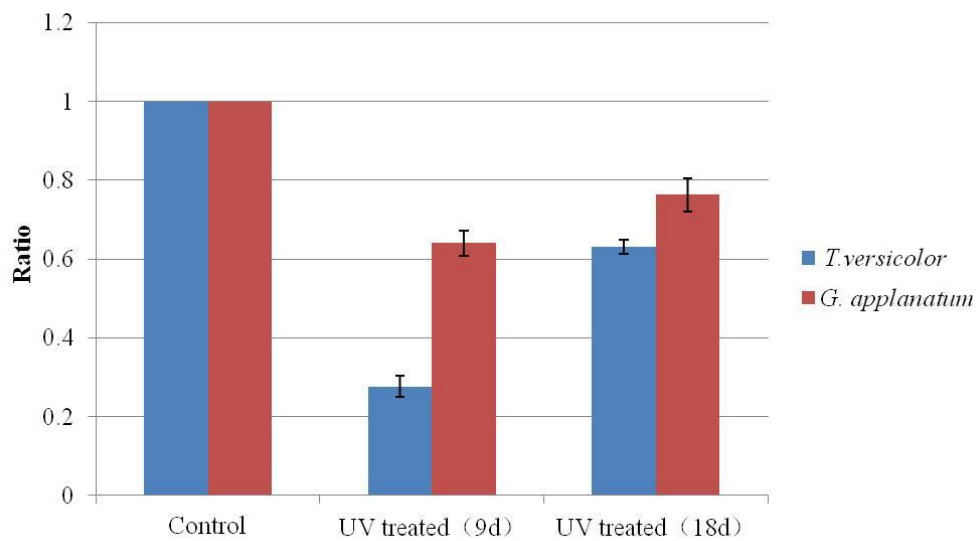

**Figure S10.** Comparison of mycelium wet weight between UV-treated fungi and the control on the days 9 and 18. The y axis is the ratio of the wet weight of UV-treated *G. applanatum* or *T. versicolor* to the wet weight of fungi without treatment (the control). The average value for the control was set to 1. Data show the mean with error bars indicating standard deviation calculated from three independent biological replicates.

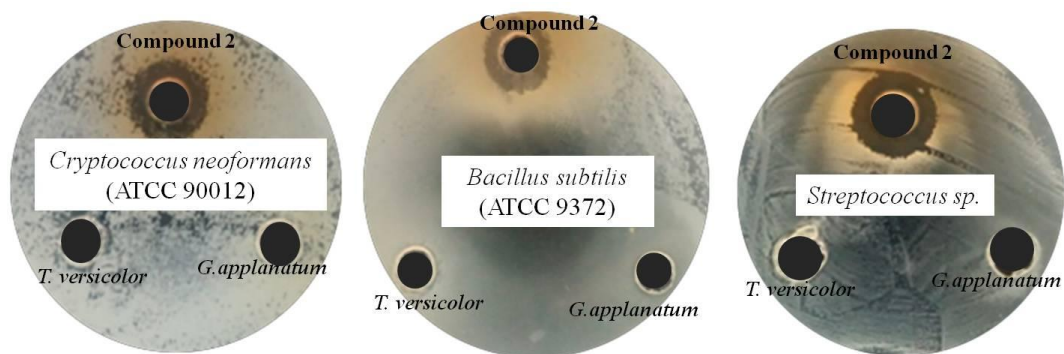

**Figure S11.** Antimicrobial activities of compound **2** by disc diffusion assay.

*Cryptococcus neoformans*, *Bacillus subtilis* and *Streptococcus* sp. were employed as antagonistic pathogenic microbe. 170  $\mu\text{M}$  of compound **2** was added to sterile borer, and 20-fold concentrated supernatant from mono-cultures of *T. versicolor* and *G. applanatum* were used as the control. The incubation was 12 hours, and zone of inhibition of compound **2** was about 1.0 cm and the control was zero.

**Table S1.** A list of seventeen basidiomycetes in this research. They were either deposited at the Shandong Province Key Lab of Applied Mycology or stored in China General Microbiological Culture Collection Center (CGMCC).

| Strains                             | Strain ID | Order           | Family           | Genus         | Wood-decaying |
|-------------------------------------|-----------|-----------------|------------------|---------------|---------------|
| <i>Pleurotus ostreatus</i>          | SY10      | Agaricales      | Pleurotaceae     | Pleurotus     | Yes           |
| <i>Lentinus edodes</i>              | SY103     | Agaricales      | Marasmiaceae     | Lentinula     | Yes           |
| <i>Agaricus bisporus</i>            | SY153     | Agaricales      | Agaricaceae      | Agaricus      | No            |
| <i>Flammulina velutipes</i>         | SY204     | Agaricales      | Physalacriaceae  | Flammulina    | Yes           |
| <i>Grifola frondosa</i>             | SY251     | Polyporales     | Meripilaceae     | Grifola       | Yes           |
| <i>Pleurotus eryngii</i>            | SY302     | Agaricales      | Pleurotaceae     | Pleurotus     | Yes           |
| <i>Ganoderma applanatum</i>         | SY330     | Polyporales     | Ganodermataceae  | Ganoderma     | Yes           |
| <i>Ganoderma sinense</i>            | SY337     | Polyporales     | Ganodermataceae  | Ganoderma     | Yes           |
| <i>Ganoderma lucidum</i>            | SY341     | Polyporales     | Ganodermataceae  | Ganoderma     | Yes           |
| <i>Pleurotus nebrodensis</i>        | SY429     | Agaricales      | Pleurotaceae     | Pleurotus     | Yes           |
| <i>Phellinus igniarius</i>          | SY489     | Hymenochaetales | Hymenochaetaceae | Phellinus     | Yes           |
| <i>Cordyceps militaris</i>          | SY501     | Hypocreales     | Clavicipitaceae  | Cordyceps     | No            |
| <i>Boletus edulis</i>               | SY613     | Boletales       | Boletaceae       | Boletus       | Yes           |
| <i>Trametes versicolor</i>          | SY630     | Polyporales     | Polyporaceae     | Trametes      | Yes           |
| <i>Trametes robiniophila</i>        | SY636     | Polyporales     | Polyporaceae     | Trametes      | Yes           |
| <i>Schizophyllum commune</i>        | SY658     | Agaricales      | Schizophyllaceae | Schizophyllum | Yes           |
| <i>Sclerotium xylariae nigripis</i> | SY687     | Xylariales      | Xylariaceae      | Sclerotium    | Yes           |

**Table S2.** List of induced features in the co-culture of *T. versicolor* and *G.applanatum*.

| m/z (-)  | RT/min | Difference        | m/z (-)        | RT/min    | Difference        | m/z (+)  | RT/min | Difference        |
|----------|--------|-------------------|----------------|-----------|-------------------|----------|--------|-------------------|
| 195.0508 | 1.09   | increased         | 334.0735       | 6.34      | newly synthesized | 300.1075 | 5.86   | newly synthesized |
| 181.0616 | 2.13   | newly synthesized | 327.0909       | 6.35      | newly synthesized | 432.1502 | 5.87   | newly synthesized |
| 304.0626 | 2.13   | newly synthesized | 405.0836       | 6.3       | newly synthesized | 599.2043 | 5.88   | newly synthesized |
| 314.0901 | 2.24   | newly synthesized | 490.3025       | 6.37      | newly synthesized | 150.0554 | 5.99   | newly synthesized |
| 136.0403 | 2.57   | newly synthesized | 251.0727       | 6.68      | increased         | 304.2491 | 6.01   | newly synthesized |
| 271.0721 | 5.48   | newly synthesized | 399.2343       | 7.61      | increased         | 287.1029 | 6.05   | newly synthesized |
| 271.0725 | 5.71   | newly synthesized | 397.2227       | 7.61      | newly synthesized | 330.2643 | 6.08   | increased         |
| 244.0612 | 5.36   | newly synthesized | 387.1938       | 7.61      | newly synthesized | 334.296  | 6.09   | increased         |
| 406.1038 | 5.79   | newly synthesized | 389.2081       | 7.62      | newly synthesized | 332.2744 | 6.15   | increased         |
| 166.0509 | 5.86   | newly synthesized | <b>m/z (+)</b> | <b>RT</b> | <b>Difference</b> | 318.3028 | 6.15   | increased         |
| 298.093  | 5.87   | newly synthesized | 249.0391       | 1.1       | increased         | 316.2845 | 6.17   | increased         |
| 597.2017 | 5.88   | newly synthesized | 233.0642       | 1.18      | increased         | 348.1439 | 6.22   | newly synthesized |
| 455.1688 | 5.86   | newly synthesized | 242.1024       | 1.42      | newly synthesized | 369.2269 | 6.24   | newly synthesized |
| 165.0555 | 6.02   | increased         | 272.1128       | 2.09      | newly synthesized | 334.0862 | 6.26   | newly synthesized |
| 167.0354 | 6.05   | increased         | 140.0705       | 2.19      | increased         | 400.1019 | 6.35   | newly synthesized |
| 330.2614 | 6.13   | increased         | 270.0979       | 2.27      | newly synthesized | 299.2795 | 6.43   | Increased         |
| 311.0930 | 6.17   | increased         | 160.0385       | 2.59      | newly synthesized | 344.2858 | 7.12   | newly synthesized |
| 200.0353 | 6.17   | newly synthesized | 138.0555       | 2.7       | newly synthesized | 230.1155 | 7.46   | newly synthesized |
| 281.0834 | 6.2    | increased         | 286.1357       | 5.03      | newly synthesized | 716.5259 | 7.54   | Increased         |
| 641.1437 | 6.26   | newly synthesized | 273.0895       | 5.68      | newly synthesized | 302.3069 | 7.54   | Increased         |
| 415.2261 | 6.27   | newly synthesized | 168.0655       | 5.87      | newly synthesized | 372.3175 | 8.16   | newly synthesized |

**Table S3.**  $^1\text{H}$ -NMR and  $^{13}\text{C}$ -NMR data for compound **2**,  $\delta$  in ppm

|    | $\delta_{\text{H}}$ | $\delta_{\text{C}}$ |
|----|---------------------|---------------------|
| 1  |                     | 122.4               |
| 2  |                     | 149.0               |
| 3  | 6.76 (1H, d)        | 104.5               |
| 4  |                     | 159.0               |
| 5  | 6.62 (1H, q)        | 108.4               |
| 6  | 8.04 (1H, d)        | 123.9               |
| 7  | 8.27 (1H, brs)      | 161.4               |
| 8  | 3.77 (3H, brs)      | 56.9                |
| 1' | 4.81 (1H, d)        | 104.4               |
| 2' | 3.50 (1H, d)        | 74.9                |
| 3' | 3.44 (1H, s)        | 77.5                |
| 4' | 3.58 (1H, m)        | 71.3                |
| 5' | 3.36 (1H, s)        | 67.4                |
|    | 3.95 (1H, m)        |                     |

**Table S4.** Bioinformatics analysis of the potential xylosyltransferases encoded by*T.versicolor*. Only the potential query protein with an identity of  $\geq 20\%$  to the

database and the query length no less than 120 bps are shown.

| No | Locus tag         | Protein annotation          | length | NCBI Accession                  | query length | Identity (%) | Query start | Query stop | objective sequences ID             | objective sequence function                                                                                                                                      |
|----|-------------------|-----------------------------|--------|---------------------------------|--------------|--------------|-------------|------------|------------------------------------|------------------------------------------------------------------------------------------------------------------------------------------------------------------|
| 1  | TRAVE DRAFT_31538 | capsular associated protein | 630bp  | GI 636624487 ref XP_008043378.1 | 645          | 27.29        | 6           | 612        | GI 927760026 gb KPA43099.1         | beta-xylosyltransferase 1 [Fusarium langsethiae]                                                                                                                 |
|    |                   |                             |        |                                 | 641          | 28.71        | 30          | 628        | GI 647399448 emb CDR44236.1        | RHTO0S09e01508g1_1 [Rhodotorula toruloides]                                                                                                                      |
|    |                   |                             |        |                                 | 604          | 33.61        | 65          | 623        | GI 647397492 emb CDR40532.1        | RHTO0S05e04610g1_1 [Rhodotorula toruloides]                                                                                                                      |
|    |                   |                             |        |                                 | 600          | 26.17        | 59          | 626        | GI 751352302 gb KIL90024.1         | beta-xylosyltransferase 1 [Fusarium avenaceum]                                                                                                                   |
|    |                   |                             |        |                                 | 600          | 23.17        | 65          | 626        | GI 949392729 dbj GAP84327.1        | putative glycosyltransferase family 90 protein [Rosellinia necatrix]                                                                                             |
|    |                   |                             |        |                                 | 599          | 50.58        | 60          | 626        | GI 924113091 emb CUA78292.1        | Beta-1,2-xylosyltransferase 1 [Rhizoctonia solani]                                                                                                               |
|    |                   |                             |        |                                 | 599          | 28.05        | 60          | 628        | GI 816192268 emb CRG85785.1        | Beta-1,2-xylosyltransferase 1 [Talaromyces islandicus]                                                                                                           |
|    |                   |                             |        |                                 | 598          | 27.26        | 60          | 626        | GI 358386117 gb EHK23713.1         | glycosyltransferase family 90 protein [Trichoderma virens Gv29-8]                                                                                                |
|    |                   |                             |        |                                 | 598          | 27.26        | 60          | 626        | GI 927424180 ref XP_013957921.1    | glycosyltransferase family 90 protein [Trichoderma virens Gv29-8]                                                                                                |
|    |                   |                             |        |                                 | 598          | 26.76        | 64          | 626        | GI 927760719 gb KPA43756.1         | xylosyltransferase 1 [Fusarium langsethiae]                                                                                                                      |
|    |                   |                             |        |                                 | 597          | 28.81        | 58          | 626        | GI 358398656 gb EHK48007.1         | glycosyltransferase family 90 protein [Trichoderma atroviride IMI 206040]                                                                                        |
|    |                   |                             |        |                                 | 597          | 28.81        | 58          | 626        | GI 927400707 ref XP_013946199.1    | glycosyltransferase family 90 protein [Trichoderma atroviride IMI 206040]                                                                                        |
|    |                   |                             |        |                                 | 592          | 29.39        | 65          | 625        | GI 647397714 emb CDR40950.1        | RHTO0S05e09553g1_1 [Rhodotorula toruloides]                                                                                                                      |
|    |                   |                             |        |                                 | 590          | 27.8         | 71          | 626        | GI 358377868 gb EHK15551.1         | glycosyltransferase family 90 protein [Trichoderma virens Gv29-8]                                                                                                |
|    |                   |                             |        |                                 | 590          | 27.8         | 71          | 626        | GI 927406821 ref XP_013949749.1    | glycosyltransferase family 90 protein [Trichoderma virens Gv29-8]                                                                                                |
|    |                   |                             |        |                                 | 589          | 49.41        | 57          | 615        | GI 751836596 emb CEL53282.1        | Beta-1,2-xylosyltransferase 1 OS=Cryptococcus neoformans var. neoformans serotype D (strain JEC21 / ATCC MYA-565) GN=CXT1 PE=1 SV=1 [Rhizoctonia solani AG-1 IB] |
|    |                   |                             |        |                                 | 586          | 27.13        | 71          | 628        | GI 358386962 gb EHK24557.1         | glycosyltransferase family 90 protein [Trichoderma virens Gv29-8]                                                                                                |
|    |                   |                             |        |                                 | 586          | 27.13        | 71          | 628        | GI 927425858 ref XP_013958760.1    | glycosyltransferase family 90 protein [Trichoderma virens Gv29-8]                                                                                                |
|    |                   |                             |        |                                 | 585          | 30.09        | 65          | 626        | GI 647402717 emb CDR48932.1        | Weakly similar to uniprot Q5K8R6 Cryptococcus                                                                                                                    |
|    |                   |                             |        |                                 | 583          | 29.67        | 63          | 629        | GI 647397729 emb CDR40965.1        | RHTO0S05e09890g1_1 [Rhodotorula toruloides]                                                                                                                      |
|    |                   |                             |        |                                 | 582          | 28.35        | 65          | 629        | GI 74682361 sp Q5K8R6.1 CXT1_CRYNJ | RecName: Full=beta-1,2-xylosyltransferase 1; Short=Cxt1p                                                                                                         |
|    |                   |                             |        |                                 | 582          | 28.35        | 65          | 629        | GI 58261216 ref XP_568018.1        | cryptococcal xylosyltransferase 1 [Cryptococcus neoformans var. neoformans JEC21]                                                                                |
|    |                   |                             |        |                                 | 582          | 28.35        | 65          | 629        | GI 57230100 gb AAW46501.1          | cryptococcal xylosyltransferase 1 [Cryptococcus neoformans var. neoformans JEC21]                                                                                |

|   |                          |                                                           |       |                                         |     |       | neoformans JEC21] |     |                                         |                                                                                                                                                                                     |
|---|--------------------------|-----------------------------------------------------------|-------|-----------------------------------------|-----|-------|-------------------|-----|-----------------------------------------|-------------------------------------------------------------------------------------------------------------------------------------------------------------------------------------|
|   |                          |                                                           |       |                                         | 582 | 28.35 | 65                | 629 | GI 146742896 gb ABQ42713.1              | beta-1,2 xylosyltransferase 1<br>[ <i>Cryptococcus neoformans</i> var.<br>neoformans]                                                                                               |
|   |                          |                                                           |       |                                         | 578 | 27.85 | 60                | 622 | GI 647397408 emb CDR40393.1             | RHTO0S05e02784g1_1 [ <i>Rhodotorula<br/>toruloides</i> ]                                                                                                                            |
|   |                          |                                                           |       |                                         | 577 | 29.81 | 65                | 630 | GI 647397582 emb CDR40723.1             | RHTO0S05e06634g1_1 [ <i>Rhodotorula<br/>toruloides</i> ]                                                                                                                            |
|   |                          |                                                           |       |                                         | 577 | 26.69 | 54                | 623 | GI 949389023 dbj GAP88019.1             | putative glycosyltransferase family 90<br>protein [ <i>Rosellinia necatrix</i> ]                                                                                                    |
|   |                          |                                                           |       |                                         | 576 | 27.08 | 65                | 628 | GI 924115849 emb CUA75853.1<br>         | hypothetical protein<br>RSOLAG2IIB_01853 [ <i>Rhizoctonia<br/>solani</i> ]                                                                                                          |
|   |                          |                                                           |       |                                         | 574 | 28.57 | 65                | 627 | GI 647397677 emb CDR40913.1             | RHTO0S05e08724g1_1 [ <i>Rhodotorula<br/>toruloides</i> ]                                                                                                                            |
|   |                          |                                                           |       |                                         | 574 | 27.18 | 65                | 628 | GI 751840883 emb CEL55146.1             | hypothetical protein<br>RSOLAG1IB_01154 [ <i>Rhizoctonia<br/>solani AG-1 IB</i> ]                                                                                                   |
|   |                          |                                                           |       |                                         | 572 | 28.67 | 63                | 625 | GI 358386481 gb EHK24077.1              | glycosyltransferase family 90 protein<br>[ <i>Trichoderma virens</i> Gv29-8]                                                                                                        |
|   |                          |                                                           |       |                                         | 572 | 28.67 | 63                | 625 | GI 927424890 ref XP_01395827<br>6.1     | glycosyltransferase family 90 protein<br>[ <i>Trichoderma virens</i> Gv29-8]                                                                                                        |
|   |                          |                                                           |       |                                         | 546 | 26.74 | 82                | 622 | GI 927751359 gb KPA36041.1              | beta--xylosyltransferase 1 [ <i>Fusarium<br/>langsethiae</i> ]                                                                                                                      |
|   |                          |                                                           |       |                                         | 506 | 24.31 | 62                | 560 | GI 927750330 gb KPA35555.1              | beta--xylosyltransferase 1 [ <i>Fusarium<br/>langsethiae</i> ]                                                                                                                      |
| 2 | TRAVE<br>DRAFT_<br>31521 | hypothetical<br>protein                                   | 558bp | GI 636624477 r<br>ef XP_0080433<br>73.1 | 556 | 49.82 | 6                 | 558 | GI 751836596 emb CEL53282.1             | Beta-1,2-xylosyltransferase 1<br>[ <i>Rhizoctonia solani</i> AG-1 IB]                                                                                                               |
| 3 | TRAVE<br>DRAFT_<br>56171 | UDP-<br>Glycosyltransf<br>erase/glycogen<br>phosphorylase | 515bp | GI 636605689 r<br>ef XP_0080339<br>79.1 | 331 | 25.98 | 193               | 509 | GI 5802783 gb AAD51778.1 AF<br>116858_1 | zeatin O-xylosyltransferase [ <i>Phaseolus<br/>vulgaris</i> ]                                                                                                                       |
|   |                          |                                                           |       |                                         | 331 | 25.98 | 193               | 509 | GI 6226511 sp P56725.1 ZOX_P<br>HAVU    | Full=Zeatin O-xylosyltransferase;<br>AltName: Full=Zeatin O-beta-D-<br>xylosyltransferase [ <i>Phaseolus vulgaris</i> ]                                                             |
|   |                          |                                                           |       |                                         | 293 | 27.3  | 239               | 503 | GI 15234056 ref NP_192016.1             | UDP-glycosyltransferase 72B1<br>[ <i>Arabidopsis thaliana</i> ]                                                                                                                     |
|   |                          |                                                           |       |                                         | 293 | 27.3  | 239               | 503 | GI 332656577 gb AEE81977.1              | UDP-glycosyltransferase 72B1<br>[ <i>Arabidopsis thaliana</i> ]                                                                                                                     |
|   |                          |                                                           |       |                                         | 229 | 25.33 | 263               | 477 | GI 75311632 sp Q9LVW3.1 AX<br>YLT_ARATH | RecName: Full=Anthocyanidin 3-O-<br>glucoside 2"-O-xylosyltransferase;<br>Short=A3G2'XylT [ <i>Arabidopsis<br/>thaliana</i> ]                                                       |
| 4 | TRAVE<br>DRAFT_<br>73641 | hypothetical<br>protein                                   | 444bp | GI 636620747 r<br>ef XP_0080415<br>08.1 | 317 | 25.87 | 130               | 414 | GI 829746565 ref XP_01261067<br>5.1     | PREDICTED: xylosyltransferase 1<br>[ <i>Microcebus murinus</i> ]                                                                                                                    |
|   |                          |                                                           |       |                                         | 286 | 23.78 | 90                | 332 | GI 512987849 ref XP_00485585<br>1.1     | PREDICTED: xylosyltransferase 1<br>[ <i>Heterocephalus glaber</i> ]                                                                                                                 |
|   |                          |                                                           |       |                                         | 267 | 22.47 | 90                | 306 | GI 694962633 ref XP_00942865<br>8.1     | PREDICTED: xylosyltransferase 1<br>isoform X1 [ <i>Pan troglodytes</i> ]                                                                                                            |
|   |                          |                                                           |       |                                         | 267 | 23.22 | 90                | 306 | GI 795246872 ref XP_01191773<br>9.1     | PREDICTED: xylosyltransferase 1<br>[ <i>Cercocebus atys</i> ]                                                                                                                       |
|   |                          |                                                           |       |                                         | 267 | 23.22 | 90                | 306 | GI 967501808 ref XP_01498119<br>3.1     | PREDICTED: xylosyltransferase 1<br>[ <i>Macaca mulatta</i> ]                                                                                                                        |
|   |                          |                                                           |       |                                         | 266 | 21.05 | 90                | 306 | GI 837808540 ref XP_01278291<br>1.1     | PREDICTED: xylosyltransferase 1<br>[ <i>Ochotona princeps</i> ]                                                                                                                     |
|   |                          |                                                           |       |                                         | 266 | 23.68 | 90                | 306 | GI 71164803 sp Q86Y38.1 XYL<br>T1_HUMAN | RecName: Full=Xylosyltransferase I;<br>AltName: Full=Peptide O-<br>xylosyltransferase I; AltName:<br>Full=Xylosyltransferase I; Short=XT-I;<br>Short=XylT-1 [ <i>Homo sapiens</i> ] |
|   |                          |                                                           |       |                                         | 266 | 23.68 | 90                | 306 | GI 162317952 gb AAI56040.1              | Xylosyltransferase I, partial [ <i>synthetic<br/>construct</i> ]                                                                                                                    |
|   |                          |                                                           |       |                                         | 266 | 23.68 | 90                | 306 | GI 28172878 emb CAD62248.1              | xylosyltransferase I [ <i>Homo sapiens</i> ]                                                                                                                                        |

|   |                   |                               |       |                                 |     |       |     |     |                                     |                                                                                                                                                                        |
|---|-------------------|-------------------------------|-------|---------------------------------|-----|-------|-----|-----|-------------------------------------|------------------------------------------------------------------------------------------------------------------------------------------------------------------------|
|   |                   |                               |       |                                 | 266 | 23.68 | 90  | 306 | GI 767987432 ref XP_011520876.1     | PREDICTED: xylosyltransferase 1 isoform X1 [ <i>Homo sapiens</i> ]                                                                                                     |
|   |                   |                               |       |                                 | 266 | 23.68 | 90  | 306 | GI 28269693 ref NP_071449.1         | xylosyltransferase 1 precursor [ <i>Homo sapiens</i> ]                                                                                                                 |
|   |                   |                               |       |                                 | 265 | 23.77 | 88  | 306 | GI 795501572 ref XP_011710287.1     | PREDICTED: LOW QUALITY PROTEIN: xylosyltransferase 1 [ <i>Macaca nemestrina</i> ]                                                                                      |
|   |                   |                               |       |                                 | 234 | 25.21 | 189 | 414 | GI 71164803 sp Q86Y38.1 XYLT1_HUMAN | RecName: Full=Xylosyltransferase 1; AltName: Full=Peptide O-xylosyltransferase 1; AltName: Full=Xylosyltransferase 1; Short=XT-1; Short=XylT-1 [ <i>Homo sapiens</i> ] |
|   |                   |                               |       |                                 | 234 | 25.21 | 189 | 414 | GI 162317952 gb AAI56040.1          | Xylosyltransferase I, partial [synthetic construct]                                                                                                                    |
|   |                   |                               |       |                                 | 234 | 25.21 | 189 | 414 | GI 28172878 emb CAD62248.1          | xylosyltransferase I [ <i>Homo sapiens</i> ]                                                                                                                           |
|   |                   |                               |       |                                 | 234 | 25.21 | 189 | 414 | GI 767987432 ref XP_011520876.1     | PREDICTED: xylosyltransferase 1 isoform X1 [ <i>Homo sapiens</i> ]                                                                                                     |
|   |                   |                               |       |                                 | 234 | 25.21 | 189 | 414 | GI 28269693 ref NP_071449.1         | xylosyltransferase 1 precursor [ <i>Homo sapiens</i> ]                                                                                                                 |
|   |                   |                               |       |                                 | 219 | 21.46 | 136 | 306 | GI 507701081 ref XP_004644560.1     | PREDICTED: xylosyltransferase 1 [ <i>Octodon degus</i> ]                                                                                                               |
|   |                   |                               |       |                                 | 215 | 23.72 | 189 | 390 | GI 512987849 ref XP_004855851.1     | PREDICTED: xylosyltransferase 1 [ <i>Heterocephalus glaber</i> ]                                                                                                       |
| 5 | TRAVE DRAFT_62781 | hypothetical protein          | 539bp | GI 636606177 ref XP_008034223.1 | 287 | 26.48 | 77  | 332 | GI 829746565 ref XP_012610675.1     | PREDICTED: xylosyltransferase 1 [ <i>Microcebus murinus</i> ]                                                                                                          |
|   |                   |                               |       |                                 | 209 | 24.88 | 170 | 361 | GI 296473377 tpg DAA15492.1         | TPA: xylosyltransferase I [ <i>Bos taurus</i> ]                                                                                                                        |
|   |                   |                               |       |                                 | 209 | 24.88 | 170 | 361 | GI 297490134 ref XP_002698083.1     | PREDICTED: xylosyltransferase 1 [ <i>Bos taurus</i> ]                                                                                                                  |
|   |                   |                               |       |                                 | 209 | 24.88 | 170 | 361 | GI 983007045 ref XP_002703127.3     | PREDICTED: xylosyltransferase 1 [ <i>Bos taurus</i> ]                                                                                                                  |
|   |                   |                               |       |                                 | 206 | 25.24 | 170 | 361 | GI 803250859 ref XP_011985388.1     | PREDICTED: xylosyltransferase 1 isoform X2 [ <i>Ovis aries musimon</i> ]                                                                                               |
| 6 | TRAVE DRAFT_59053 | hypothetical protein          | 420bp | GI 636616829 ref XP_008039549.1 | 272 | 26.1  | 143 | 391 | GI 521027181 gb EPQ08969.1          | Xylosyltransferase 2 [ <i>Myotis brandtii</i> ]                                                                                                                        |
|   |                   |                               |       |                                 | 239 | 24.69 | 171 | 391 | GI 940773949 ref XP_014302937.1     | PREDICTED: xylosyltransferase 2 isoform X1 [ <i>Myotis lucifugus</i> ]                                                                                                 |
|   |                   |                               |       |                                 | 236 | 25.85 | 171 | 391 | GI 554547365 ref XP_005868235.1     | PREDICTED: xylosyltransferase 2 isoform X2 [ <i>Myotis brandtii</i> ]                                                                                                  |
|   |                   |                               |       |                                 | 236 | 25.85 | 171 | 391 | GI 946767238 ref XP_014396660.1     | PREDICTED: xylosyltransferase 2 isoform X1 [ <i>Myotis brandtii</i> ]                                                                                                  |
| 7 | TRAVE DRAFT_63062 | hypothetical protein          | 551bp | GI 636608203 ref XP_008035236.1 | 487 | 30.8  | 16  | 488 | GI 949393989 dbj GAP83249.1         | putative wsc domain protein [ <i>Rosellinia necatrix</i> ]                                                                                                             |
|   |                   |                               |       |                                 | 193 | 25.91 | 368 | 545 | GI 908390298 gb KND90936.1          | Xylosyltransferase oxt [ <i>Tolypocladium ophioglossoides</i> CBS 100239]                                                                                              |
|   |                   |                               |       |                                 | 149 | 25.5  | 384 | 510 | GI 972140057 gb KUI66306.1          | Xylosyltransferase oxt [ <i>Valsa mali</i> ]                                                                                                                           |
|   |                   |                               |       |                                 | 130 | 27.69 | 383 | 506 | GI 242008940 ref XP_002425252.1     | Xylosyltransferase oxt, putative [ <i>Pediculus humanus corporis</i> ]                                                                                                 |
|   |                   |                               |       |                                 | 130 | 27.69 | 383 | 506 | GI 212509000 gb EEB12514.1          | Xylosyltransferase oxt, putative [ <i>Pediculus humanus corporis</i> ]                                                                                                 |
|   |                   |                               |       |                                 | 130 | 22.31 | 380 | 500 | GI 954303764 gb KRX92080.1          | Xylosyltransferase sqv-6 [ <i>Trichinella pseudospiralis</i> ]                                                                                                         |
| 8 | TRAVE DRAFT_73853 | WSC-domain-containing protein | 768bp | GI 636622007 ref XP_008042138.1 | 326 | 24.54 | 452 | 742 | GI 701771360 gb KGQ06159.1          | Xylosyltransferase oxt [ <i>Beauveria bassiana D1-5</i> ]                                                                                                              |
|   |                   |                               |       |                                 | 313 | 25.88 | 315 | 626 | GI 949391510 dbj GAP85657.1         | putative copper radical oxidase [ <i>Rosellinia necatrix</i> ]                                                                                                         |
|   |                   |                               |       |                                 | 302 | 25.5  | 449 | 742 | GI 908390298 gb KND90936.1          | Xylosyltransferase oxt [ <i>Tolypocladium ophioglossoides</i> CBS 100239]                                                                                              |
|   |                   |                               |       |                                 | 301 | 44.52 | 5   | 296 | GI 949393989 dbj GAP83249.1         | putative wsc domain protein [ <i>Rosellinia</i> ]                                                                                                                      |



|   |                          |                                      |       |                                 | <i>necatrix</i> ] |       |     |                                 |                                                                           |                                                            |
|---|--------------------------|--------------------------------------|-------|---------------------------------|-------------------|-------|-----|---------------------------------|---------------------------------------------------------------------------|------------------------------------------------------------|
|   |                          |                                      |       | 248                             | 28.63             | 502   | 745 | GI 949391510 dbj GAP85657.1     | putative copper radical oxidase [ <i>Rosellinia necatrix</i> ]            |                                                            |
|   |                          |                                      |       | 222                             | 27.93             | 524   | 742 | GI 919012629 ref XP_013390783.1 | PREDICTED: xylosyltransferase oxt-like [ <i>Lingula anatina</i> ]         |                                                            |
|   |                          |                                      |       | 221                             | 24.89             | 270   | 481 | GI 949391510 dbj GAP85657.1     | putative copper radical oxidase [ <i>Rosellinia necatrix</i> ]            |                                                            |
|   |                          |                                      |       | 219                             | 22.83             | 381   | 592 | GI 972142722 gb KUI68971.1      | Xylosyltransferase oxt [ <i>Valsa mali</i> ]                              |                                                            |
|   |                          |                                      |       | 213                             | 26.76             | 532   | 732 | GI 972142722 gb KUI68971.1      | Xylosyltransferase oxt [ <i>Valsa mali</i> ]                              |                                                            |
|   |                          |                                      |       | 204                             | 26.96             | 542   | 742 | GI 925201043 gb JAI52582.1      | putative xylosyltransferase oxt, partial [ <i>Rhodnius neglectus</i> ]    |                                                            |
| 9 | TRAVE<br>DRAFT_<br>73850 | WSC-domain-<br>containing<br>protein | 463bp | GI 636622003 ref XP_008042136.1 | 283               | 44.17 | 147 | 6                               | GI 949393989 dbj GAP83249.1                                               | putative wsc domain protein [ <i>Rosellinia necatrix</i> ] |
|   |                          |                                      |       | 176                             | 27.84             | 112   | 8   | GI 1003743824 gb KXX79436.1     | Xylosyltransferase oxt [ <i>Madurella mycetomatis</i> ]                   |                                                            |
|   |                          |                                      |       | 140                             | 27.86             | 93    | 4   | GI 780631854 ref XP_011685660.1 | PREDICTED: xylosyltransferase oxt [ <i>Wasmannia auropunctata</i> ]       |                                                            |
|   |                          |                                      |       | 137                             | 35.77             | 81    | 3   | GI 949391510 dbj GAP85657.1     | putative copper radical oxidase [ <i>Rosellinia necatrix</i> ]            |                                                            |
|   |                          |                                      |       | 133                             | 25.56             | 91    | 3   | GI 908390298 gb KND90936.1      | Xylosyltransferase oxt [ <i>Tolypocladium ophioglossoides</i> CBS 100239] |                                                            |
|   |                          |                                      |       | 132                             | 28.79             | 73    | 7   | GI 961440096 emb CUT99591.1     | xylosyltransferase [ <i>Echinococcus multilocularis</i> ]                 |                                                            |
|   |                          |                                      |       | 130                             | 30.77             | 67    | 7   | GI 972140057 gb KUI66306.1      | Xylosyltransferase oxt [ <i>Valsa mali</i> ]                              |                                                            |
|   |                          |                                      |       | 128                             | 28.13             | 76    | 3   | GI 949391510 dbj GAP85657.1     | putative copper radical oxidase [ <i>Rosellinia necatrix</i> ]            |                                                            |

**Table S5.** Primers used in this study.

| <b>Primer Name</b> | <b>Sequence (5'-3')</b>  | <b>Tm</b> | <b>Length(bp)</b> |
|--------------------|--------------------------|-----------|-------------------|
| GAPDH-F            | CGGAATCAACGGTTTAGGTC     | 57.2      | 221               |
| GAPDH-R            | TTCCTGGAAGACGGTGATG      | 57.9      |                   |
| 1-GI636624487-F    | TCCCGAGCCATTACTACTACG    | 57.4      | 197               |
| 1-GI636624487-R    | GAATCTATGACGCTGATACTGTGC | 58.7      |                   |
| 2-GI636624477-F    | CTGATGATTCCAACCCCTTTC    | 58.5      | 189               |
| 2-GI636624477-R    | ATACTGAACCGCCAACGATAC    | 57.0      |                   |
| 3-GI636605689-F    | CGGGGAGAAACAACAGTCAT     | 57.2      | 193               |
| 3-GI636605689-R    | ATGGCTCAGGATGAATGGG      | 57.6      |                   |
| 4-GI636620747-F    | TCTGCCCTTTCCCTTTTC       | 59.1      | 124               |
| 4-GI636620747-R    | GCTTTGATCGCTGCTCTAGTTC   | 59.0      |                   |
| 5-GI636606177-F    | CTGCTTTGACTCGGCAATAGA    | 58.3      | 98                |
| 5-GI636606177-R    | AGAAAAGTGGTGAAGGGGAAA    | 58.1      |                   |
| 6-GI636616829-F    | ACCATTCCCAGCAACTACC      | 58.8      | 226               |
| 6-GI636616829-R    | GGTCAAGTGGCGTCAGGA       | 58.8      |                   |
